# Supplementary material for: Ultrasensitive detection of thiram based on surface-enhanced Raman scatteringviaAu@Ag@Ag core/shell/shell bimetallic nanorods
Source: Royal Society of Chemistry journal article supplement (doi:10.1039/d3an00821e), 2023-01-01
Supplement: d3an00821e1.zip [file d3an00821e1.zip]

**Table. S1.** Table of the SERS bands associated with thiram1

| Raman shift (cm-1) | Assignment |
| --- | --- |
| 423 (vw)  548 (m)  917 (m)  1130 (m)  1368 (vs)  1441 (vw)  1495 (m) | υ(C=S)  υ(S-S)  υ(CH3N), υ(C=S)  ρ(CH3), υ(CN)  δ s(CH3), υ(CH3)  δ as(CH3)  ρ(CH3), υ(CN) |

Note: s = strong, w = weak, m = medium, sh = shoulder, v = very, υ = stretching, δ = deformation, ρ = rocking.

References

1 M. Chen, W. Luo, Q. Liu, N. Hao, Y. Zhu, M. Liu, L. Wang, H. Yang and X. Chen, Anal. Chem. 2018, 90, 13647–13654.
