# Supplementary material for: Ultrasensitive detection of thiram based on surface-enhanced Raman scatteringviaAu@Ag@Ag core/shell/shell bimetallic nanorods
Source: Royal Society of Chemistry journal article supplement (doi:10.1039/d3an00821e), 2023-01-01
Supplement: d3an00821e1.zip [file d3an00821e1.zip]

## Electronic Supplementary Information

### Ultrasensitive detection of thiram based on surface-enhanced Raman scattering via Au@Ag@Ag core/shell/shell bimetallic nanorods

Yuqiu Wang<sup>a</sup>, Shuchang Liu<sup>a</sup>, Yongjun Hu<sup>\*a,b,c</sup>, Cuicui Fu<sup>\*d</sup>, Weiqiang Chen<sup>\*a,b,c</sup>

<sup>a</sup> MOE Key Laboratory of Laser Life Science & Institute of Laser Life Science, College of Biophotonics, South China Normal University, Guangzhou 510631, PR China.

<sup>b</sup> Guangdong Provincial Key Laboratory of Laser Life Science, College of Biophotonics, South China Normal University, Guangzhou, 510631, China.

<sup>c</sup> Guangzhou Key Laboratory of Spectral Analysis and Functional Probes, College of Biophotonics, South China Normal University, Guangzhou 510631, China.

<sup>d</sup> Chongqing Key Laboratory of Inorganic Special Functional Materials, College of Chemistry and Chemical Engineering, Yangtze Normal University, Chongqing, 408100, China.

\*Email: [yjhu@scnu.edu.cn](mailto:yjhu@scnu.edu.cn) (Prof. Yongjun Hu); [chran16@163.com](mailto:chran16@163.com) (Prof. Cuicui Fu); [achenweiqiang@m.scnu.edu.cn](mailto:achenweiqiang@m.scnu.edu.cn) (Prof. Weiqiang Chen)

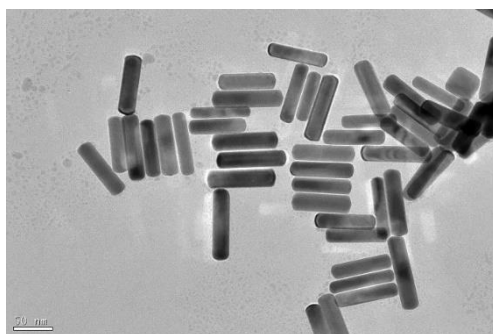

**Fig. S1** TEM images of Au NRs.

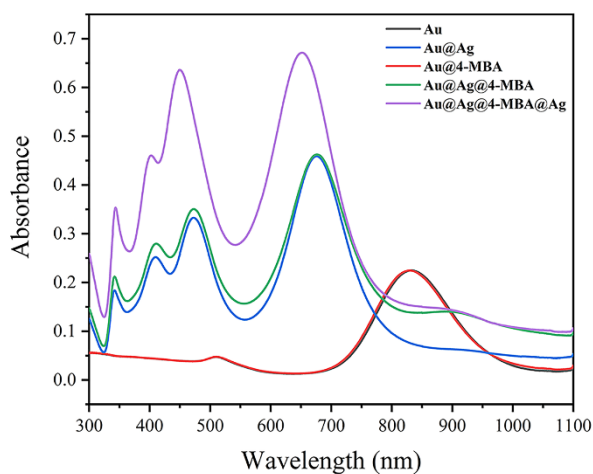

**Fig. S2** UV-visible spectra of Au NRs, Au@4-MBA NRs, Au@Ag NRs, Au@Ag@4-MBA NRs and Au@Ag@4-MBA@Ag NRs.

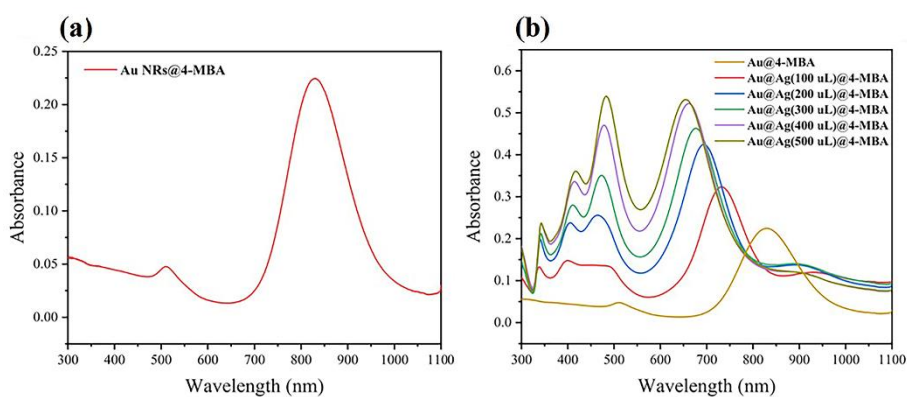

**Fig. S3** UV-vis absorption spectra of the core-only Au@4-MBA NRs (a); The UV-vis absorption spectra of the Au@Ag@4-MBA NRs synthesized with different volumes of  $\text{AgNO}_3$  (10 mM) and fixed 4-MBA concentration of  $8 \times 10^{-7}$  M (b).

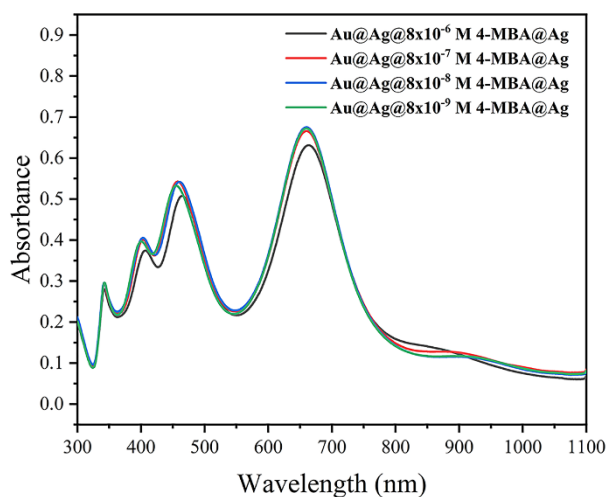

**Fig. S4** UV-vis absorption spectra of Au@Ag@4-MBA@Ag NRs synthesized using different concentrations of 4-MBA.

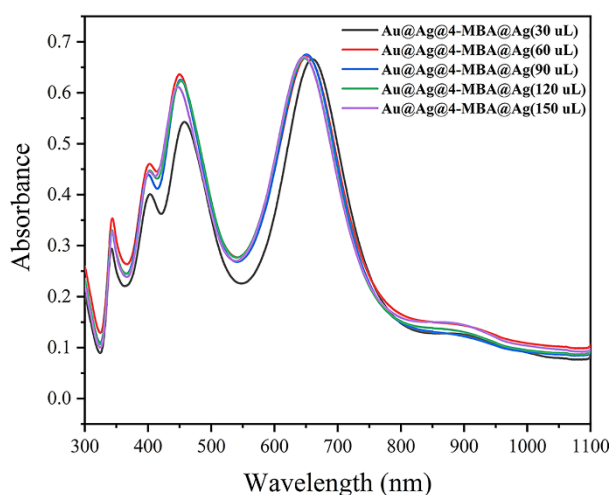

**Fig. S5** UV-vis absorption spectra of Au@Ag@4-MBA@Ag NRs with different second-Ag-layer thicknesses obtained by addition of different  $\text{AgNO}_3$  volume.

**Table S1** Table of the SERS bands associated with thiram<sup>1</sup>.

| Raman shift ( $\text{cm}^{-1}$ ) | Assignment                                            |
|----------------------------------|-------------------------------------------------------|
| 423 (vw)                         | $\nu(\text{C}=\text{S})$                              |
| 548 (m)                          | $\nu(\text{S}-\text{S})$                              |
| 917 (m)                          | $\nu(\text{CH}_3\text{N})$ , $\nu(\text{C}=\text{S})$ |
| 1130 (m)                         | $\rho(\text{CH}_3)$ , $\nu(\text{CN})$                |
| 1368 (vs)                        | $\delta \text{ s}(\text{CH}_3)$ , $\nu(\text{CH}_3)$  |
| 1441 (vw)                        | $\delta \text{ as}(\text{CH}_3)$                      |
| 1495 (m)                         | $\rho(\text{CH}_3)$ , $\nu(\text{CN})$                |

Note: s = strong, w = weak, m = medium, sh = shoulder, v = very,  $\nu$  = stretching,  $\delta$  = deformation,  $\rho$  = rocking.

## References

- 1 M. Chen, W. Luo, Q. Liu, N. Hao, Y. Zhu, M. Liu, L. Wang, H. Yang and X. Chen, *Anal. Chem.* 2018, 90, 13647–13654.
